# Supplementary material for: Useless carbonaceous impurities found to be useful in radiofrequency radiation absorption
Source: Royal Society of Chemistry journal article supplement (doi:10.1039/c0jm02686g), 2010-12-20
Supplement: c0jm02686g.pdf [file c0jm02686g.pdf]

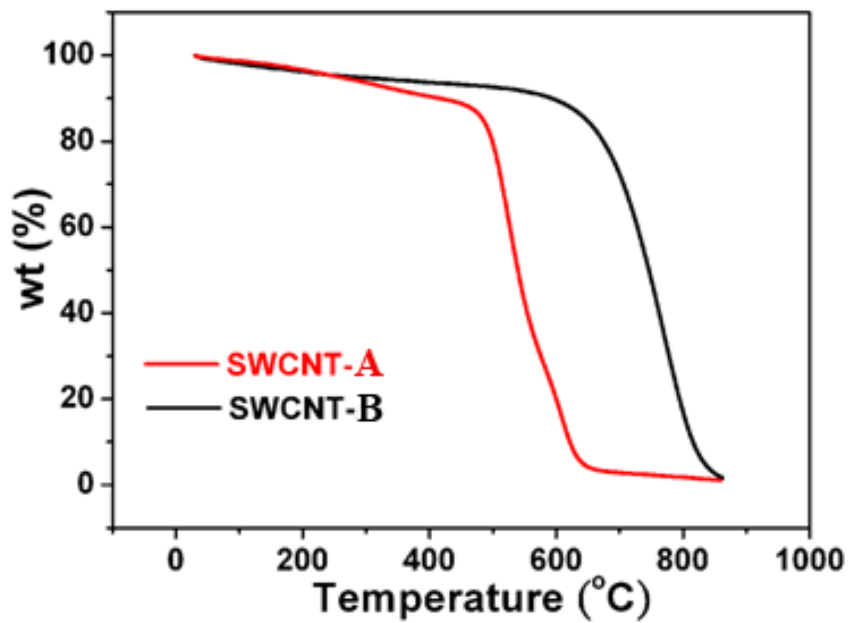

TGA profiles of pristine (red) and purified SWCNTs (dark).

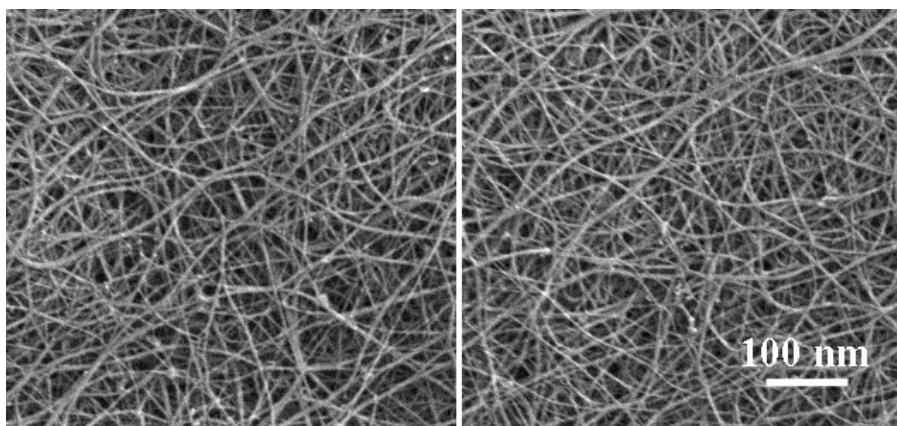

SWCNT textures of film-B at relaxed (left) and strained states (right).

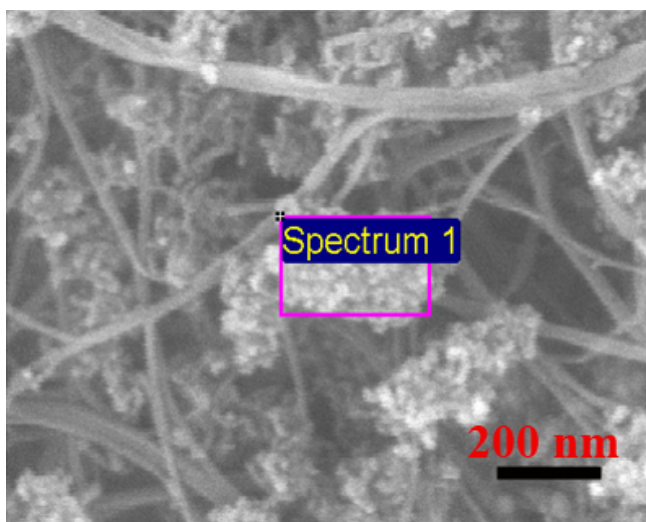

SEM image of SWCNT-A and square indicates selected area for EDX analysis.

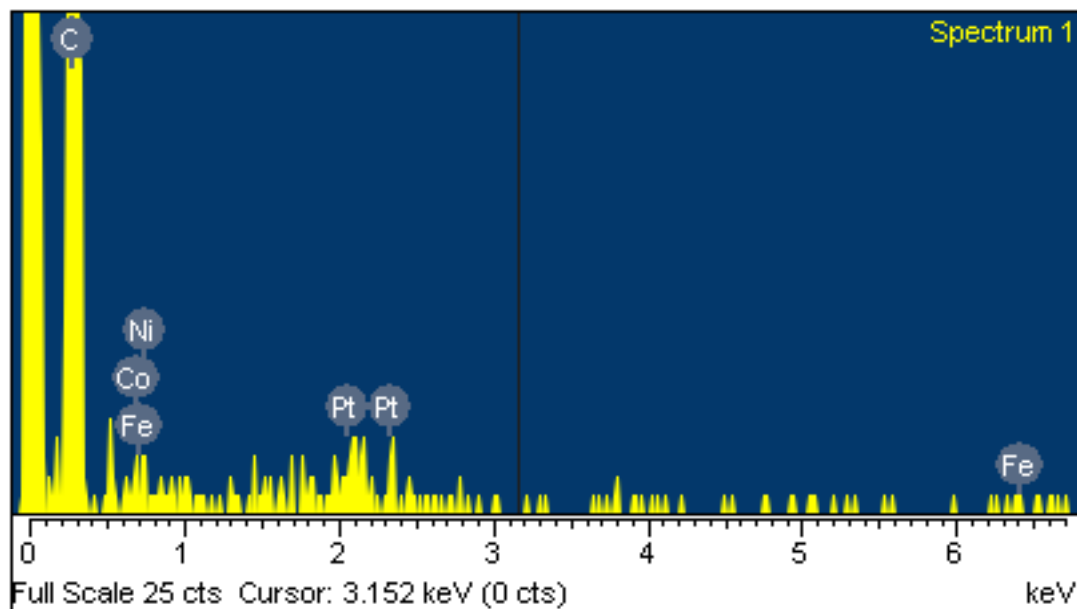

Selective area of EDX spectrum taken from SWCNT-A.

| Element | Weight% | Atomic% |
|---------|---------|---------|
| C K     | 90.81   | 99.37   |
| Fe K    | 0.01    | 0.00    |
| Co K    | 0.02    | 0.00    |
| Ni K    | 0.03    | 0.01    |
| Pt M    | 9.12    | 0.61    |
| Totals  | 100.00  |         |

Elemental analysis and fraction of SWCNT-A.

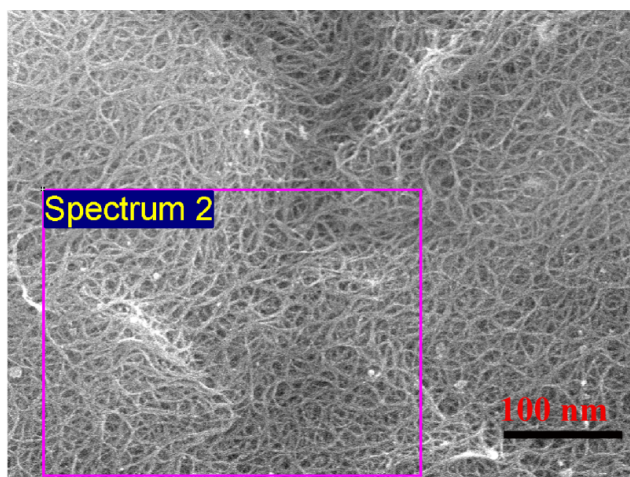

SEM image of SWCNT-B and square indicates selected area for EDX analysis.

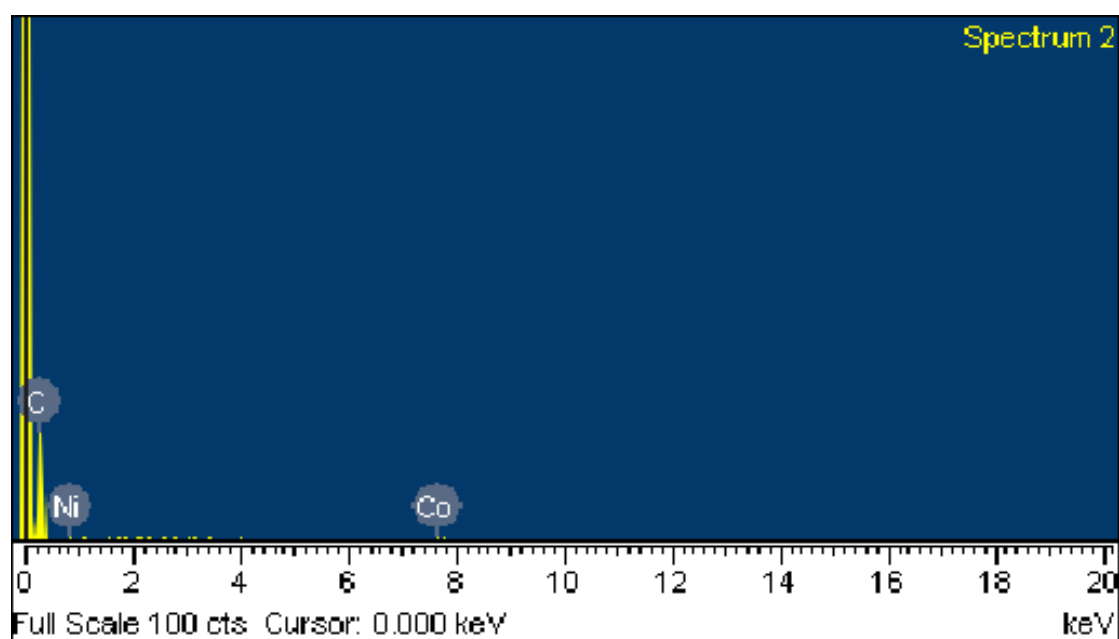

Selective area of EDX spectrum taken from SWCNT-B.

| Element | Weight% | Atomic% |
|---------|---------|---------|
| C K     | 99.63   | 99.95   |
| O K     | -0.05   | -0.04   |
| Fe K    | 0.08    | 0.02    |
| Co K    | 0.13    | 0.03    |
| Ni K    | 0.21    | 0.04    |
| Totals  | 100.00  |         |

Elemental analysis and fraction of SWCNT-B.
